# Supplementary material
Source: PubMed Central journal article supplement (PMC5729120)
Supplement: NIHMS904007-supplement-supplement_1.pdf [file NIHMS904007-supplement-supplement_1.pdf]

## SUPPLEMENTARY FIGURE LEGEND

### **Supplementary figure 1. Caspase-8 activation is involved in TNF- $\alpha$ -induced apoptosis.**

**(A)** Caspase-8 expression in MEFs was evaluated by western blot. The molecular weight markers are labeled on the left (kD). **(B)** Wild-type (WT) and caspase-8-KO MEFs were cultured with the indicated combination of recombinant human TNF- $\alpha$  and the Smac mimetic TL-32711. Cell viability was determined following 24 hour-exposure by measuring propidium iodide DNA dye exclusion. Data are presented as means  $\pm$  standard deviations of three independent experiments with duplicate samples measured in each independent experiment. Asterisks indicate  $P < 0.05$  (\*), Student's unpaired t test.

### **Supplementary figure 2. Caspase-8 is not involved in C12-induced human tumor cell death.**

**(A)** Caspase-8 expression in HCTT116 cells was stably reduced by shRNA. The expression levels of caspase-8 were determined by western blot. The molecular weight markers are labeled on the left (kD). **(B)** HCT116 cells were cultured with the indicated combination of recombinant human TNF- $\alpha$  protein and cycloheximide (CHX). Cell viability was determined following 48 hour-exposure. **(C)** The cytotoxicity of C12 on HCT116 cells was assessed 48 hours after C12 treatment. **(D)** Stable reduction of caspase-8 expression in PANC-1 cells was evaluated by western blot. The molecular weight markers are labeled on the left (kD). **(E)** TNF- $\alpha$  protein and cycloheximide (CHX) triggered more cell death in vector control PANC-1 cells than caspase-8 shRNA

cells following 24 hour exposure. **(F)** C12 induced equivalent cell death in vector-control and caspase-8-deficient PANC-1 cells after 24 hour treatment. Cell death data are presented as means  $\pm$  standard deviations of three independent experiments with duplicate samples measured in each independent experiment. Asterisks indicate  $P < 0.05$  (\*), Student's unpaired t test. ns, no significance.

**Supplementary figure 3. Caspase-9 activation is involved in chemotherapeutic drug-induced cell death.**

**(A)** Caspase-9 expression in MEFs was determined by western blot. The molecular weight markers are labeled on the left (kD). **(B)** Wild-type (WT) and caspase-9-KO MEFs were treated for 48 hours with various concentrations of etoposide (etop), and cell viability was measured. **(C)** Wild-type and caspase-9-KO MEFs were cultured with or without 0.5  $\mu$ g/ml actinomycin D (actD) for 24 hours, and cell viability was evaluated. All the data are shown as means  $\pm$  standard deviations of three independent experiments with duplicate samples measured in each independent experiment. Asterisks indicate  $P < 0.05$  (\*), Student's unpaired t test.

**Supplementary figure 4. Reexpression of caspase-9 sensitizes MEFs deficient in caspase-9 expression to C12.**

**(A)** Murine caspase-9 was reexpressed in caspase-9-KO MEFs by lentiviral infection. Caspase-9 expression was determined by western blot. The molecular weight markers are labeled on the left (kD). **(B)** Caspase-9-KO MEFs reexpressing caspase-9 or its empty vector were treated with the indicated concentrations of C12 for 48 hours, and

cell viability was examined. The data are shown as means  $\pm$  standard deviations of three independent experiments with duplicate samples measured in each independent experiment. Asterisks indicate  $P < 0.05$  (\*), Student's unpaired t test.

**Supplementary figure 5. C12-induced cell death is dependent of caspase-9.**

**(A)** Expression of Caspase-9 in MIA PaCa-2 cells was stably decreased by shRNA. Caspase-9 expression was evaluated by western blot. The molecular weight markers are labeled on the left (kD). **(B)** MIA PaCa-2 cells were cultured with the indicated concentrations of C12. Cell viability was determined following 24 hour-exposure. The data are shown as means  $\pm$  standard deviations of three independent experiments with duplicate samples measured in each independent experiment. Asterisks indicate  $P < 0.05$  (\*), Student's unpaired t test.

**Supplementary figure 6. C12-induced cell death is dependent of APAF1.**

**(A)** APAF1 expression in APAF1-deficient primary MEFs and their wild-type counterparts was determined by western blot. The molecular weight markers are labeled on the left (kD). **(B)** Wild-type (WT) and APAF1-KO MEFs were treated with various concentrations of etoposide (etop) for 48 hours, and cell viability was determined. The data are shown as means  $\pm$  standard deviations of three independent experiments with duplicate samples measured in each independent experiment. Asterisks indicate  $P < 0.05$  (\*), Student's unpaired t test. **(C)** Cell viabilities of wild-type (WT) and APAF1-KO MEFs were measured 48 hours after treatment with different doses of C12. The data are presented as means  $\pm$  standard deviations of three

independent experiments with duplicate samples measured in each independent experiment. Asterisks indicate  $P < 0.05$  (\*), Student's unpaired t test.

**Supplementary figure 7. C12 induces mitochondrial outer membrane permeabilization *in vitro* in a time-dependent fashion.**

**(A)** Mitochondria isolated from wild-type MEFs were incubated with C12 for the indicated time. One percent of DMSO was present in each sample. Cytochrome c released from mitochondria was determined by western blot. The molecular weight markers are marked on the left (kD). **(B)** Summary of the data shown in (A). As described in Materials and Methods, cytochrome c release is represented as a percentage of the sum of the protein intensity in mitochondrial fractions (P) and released fractions (S). Data represent the mean  $\pm$  S.D. of three independent experiments. Asterisks indicate  $P < 0.05$  (\*) by Student's unpaired t test.

## Supplementary figure 1

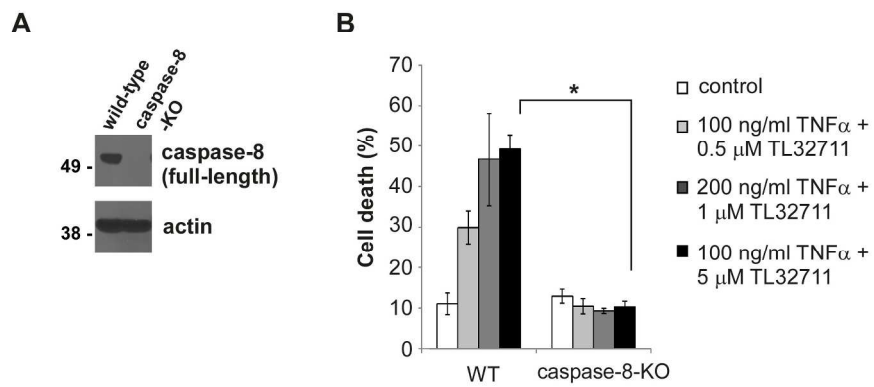

215x278mm (300 x 300 DPI)

Supplementary figure 2

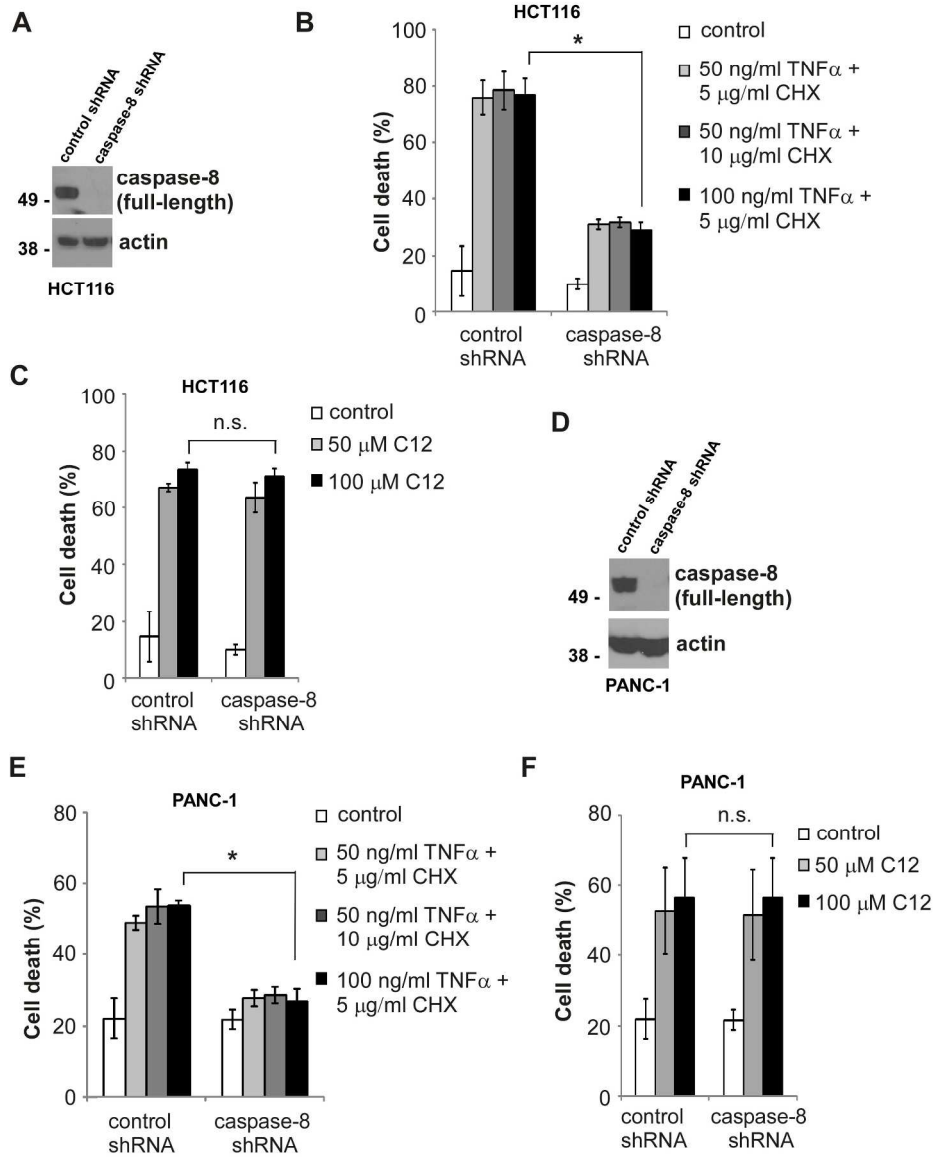

215x277mm (300 x 300 DPI)

## Supplementary figure 3

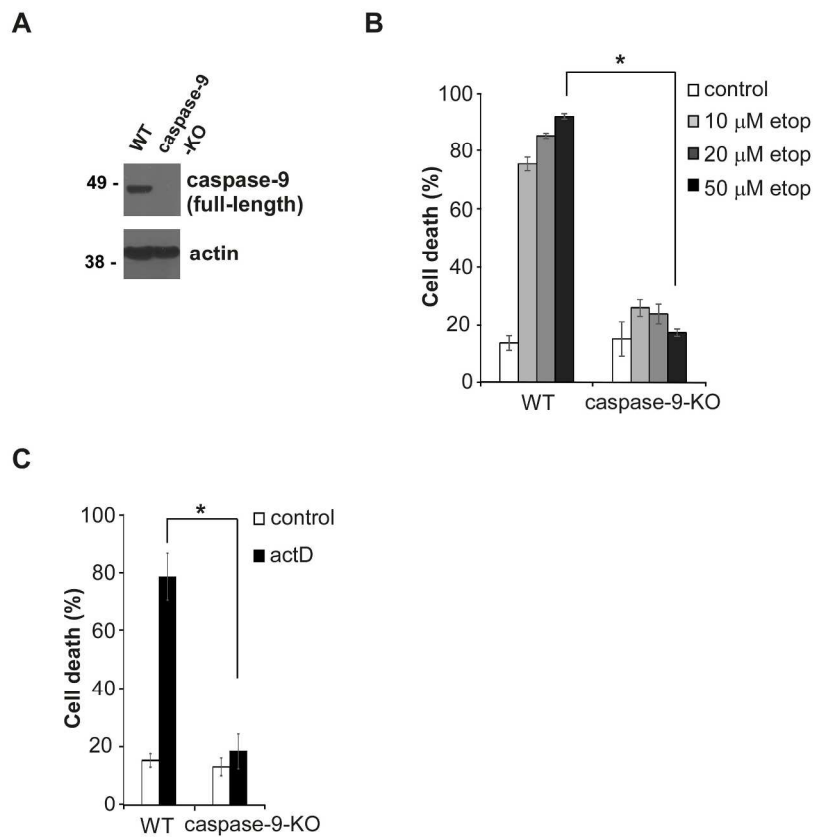

214x278mm (300 x 300 DPI)

Supplementary figure 4

A

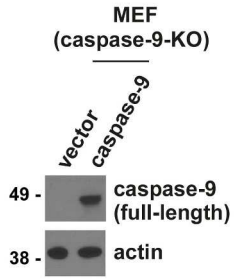

B

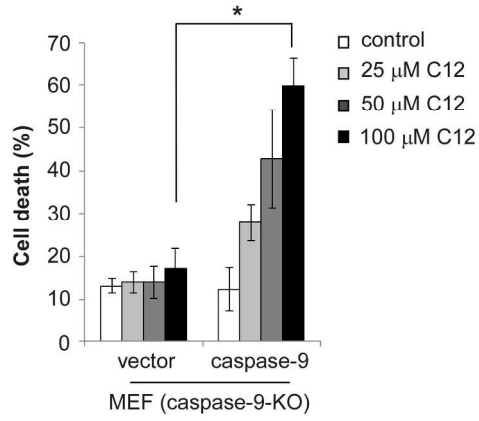



## Supplementary figure 5

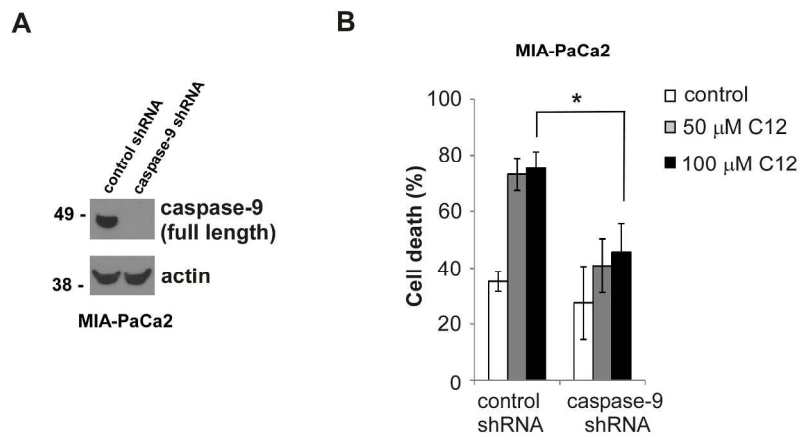

215x278mm (300 x 300 DPI)

Supplementary figure 6

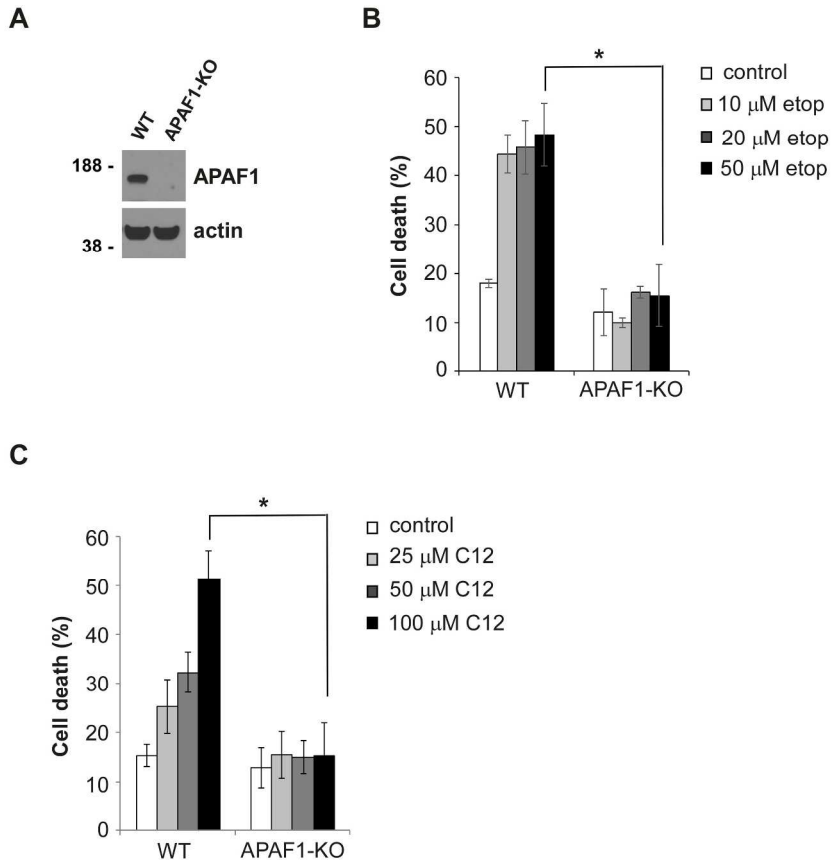

## Supplementary figure 7

A

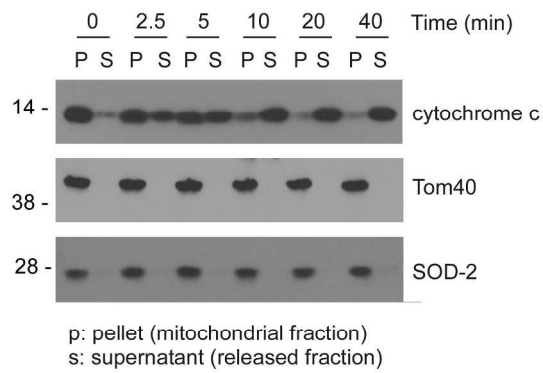

B

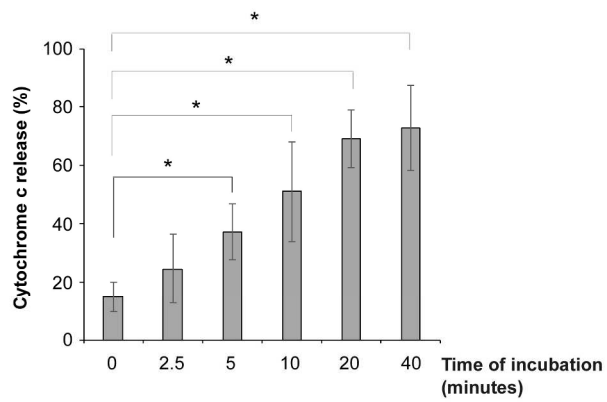

215x278mm (300 x 300 DPI)
